# Supplementary material for: Digitalizing Higher Education in Light of Sustainability and Rebound Effects—Surveys in Times of the COVID-19 Pandemic
Source: MDPI journal article supplement (doi:10.3390/su132212912), 2021-11-22
Supplement: s1 [file s1]

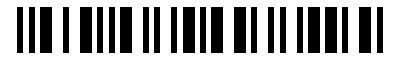

**Due to the current COVID-19 pandemic, various issues are coming more and more into the focus of the public - including digitization and sustainability.**

**The following survey is intended to examine social and ecological aspects of digital education with regard to sustainability and, based on that, to further shaping inclusive, progressive teaching and learning. This survey takes about 10-15 minutes.**

**All data are collected anonymously and are not passed on to third parties. Thank you for your participation.**

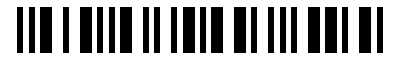

## Section A: Personal data

**A1.** Please select whether you are part of the university staff or a student at the TU Chemnitz.

University employee ☐

Student Bachelor ☐

Student Master ☐

**A2.** What semester are you in?

**A3.** What faculty do you belong to?

Faculty of Natural Sciences ☐

Faculty of Mathematics ☐

Faculty of Mechanical Engineering ☐

Faculty of Electrical Engineering and Information Technology ☐

Faculty of Computer Science ☐

Fakultät für Wirtschaftswissenschaften ☐

Faculty of Economics and Business Administration ☐

Faculty of Humanities ☐

Faculty of Behavioural and Social Sciences ☐

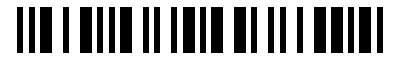

**A4.**

**Age:**

(Enter a number like 24. Not your date of birth.)

|  |  |  |
|--|--|--|
|  |  |  |
|--|--|--|

**A5. Gender:**

Female ☐

Male ☐

Prefer not to say ☐

Other ☐

Other

|  |
|--|
|  |
|--|

## Section B: Teaching and learning in times of Covid-19 (I)

**B1. Please estimate the following statements depending on the degree of your consent.**

Do not  
agree at  
all      Rather  
disagree      Partly  
agree      Agree      Strongl  
y agree

I missed the direct personal contact with fellow students, colleagues or teachers during the COVID-19 pandemic.

|                          |       |                          |       |                          |       |                          |       |                          |
|--------------------------|-------|--------------------------|-------|--------------------------|-------|--------------------------|-------|--------------------------|
| <input type="checkbox"/> | ..... | <input type="checkbox"/> |
|--------------------------|-------|--------------------------|-------|--------------------------|-------|--------------------------|-------|--------------------------|

I missed the usual change of location between the university and my place of residence during the COVID-19 pandemic.

|                          |       |                          |       |                          |       |                          |       |                          |
|--------------------------|-------|--------------------------|-------|--------------------------|-------|--------------------------|-------|--------------------------|
| <input type="checkbox"/> | ..... | <input type="checkbox"/> |
|--------------------------|-------|--------------------------|-------|--------------------------|-------|--------------------------|-------|--------------------------|

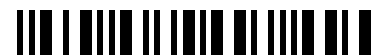

Do not  
agree at  
all      Rather  
disagree      Partly  
agree      Agree      Strongl  
y agree

The time I saved by not having to travel to the university, I could use well elsewhere.

☐ ..... ☐ ..... ☐ ..... ☐ ..... ☐

The time I saved by not having to go to the university, I could use for (digital) consumption.

☐ ..... ☐ ..... ☐ ..... ☐ ..... ☐

Constantly working or learning at home makes it difficult for me to separate my private from professional life.

☐ ..... ☐ ..... ☐ ..... ☐ ..... ☐

Working or learning at home makes me quickly feel overburdened.

☐ ..... ☐ ..... ☐ ..... ☐ ..... ☐

I prefer to work or learn paperless.

☐ ..... ☐ ..... ☐ ..... ☐ ..... ☐

I find working or learning at home rewarding.

☐ ..... ☐ ..... ☐ ..... ☐ ..... ☐

I consider digital teaching as an appropriate equivalent to classroom teaching.

☐ ..... ☐ ..... ☐ ..... ☐ ..... ☐

I could imagine to hold more digital courses in the future.

☐ ..... ☐ ..... ☐ ..... ☐ ..... ☐

I consider a combination of classroom and digital teaching to be promising for the future.

☐ ..... ☐ ..... ☐ ..... ☐ ..... ☐

**B2. Please estimate the following statements depending on the degree of your consent.**

Do not  
agree at  
all      Rather  
disagree      Partly  
agree      Agree      Strongl  
y agree

I missed the direct personal contact with fellow students, colleagues or teachers during the COVID-19 pandemic.

☐ ..... ☐ ..... ☐ ..... ☐ ..... ☐

I missed the usual change of location between the university and my place of residence during the COVID-19 pandemic.

☐ ..... ☐ ..... ☐ ..... ☐ ..... ☐

The time I saved by not having to travel to the university, I could use well elsewhere.

☐ ..... ☐ ..... ☐ ..... ☐ ..... ☐

The time I saved by not having to go to the university, I could use for (digital) consumption.

☐ ..... ☐ ..... ☐ ..... ☐ ..... ☐

Constantly working or learning at home makes it difficult for me to separate my private from professional life.

☐ ..... ☐ ..... ☐ ..... ☐ ..... ☐

Working or learning at home makes me quickly feel overburdened.

☐ ..... ☐ ..... ☐ ..... ☐ ..... ☐

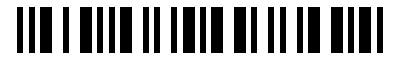

|                                                                                            | Do not<br>agree at<br>all | Rather<br>disagree       | Partly<br>agree          | Agree                    | Strongl<br>y agree       |
|--------------------------------------------------------------------------------------------|---------------------------|--------------------------|--------------------------|--------------------------|--------------------------|
| I prefer to work or learn paperless.                                                       | <input type="checkbox"/>  | <input type="checkbox"/> | <input type="checkbox"/> | <input type="checkbox"/> | <input type="checkbox"/> |
| I find working or learning at home rewarding.                                              | <input type="checkbox"/>  | <input type="checkbox"/> | <input type="checkbox"/> | <input type="checkbox"/> | <input type="checkbox"/> |
| I consider digital teaching as an appropriate equivalent to classroom teaching.            | <input type="checkbox"/>  | <input type="checkbox"/> | <input type="checkbox"/> | <input type="checkbox"/> | <input type="checkbox"/> |
| I could imagine to attend digital courses more often in the future.                        | <input type="checkbox"/>  | <input type="checkbox"/> | <input type="checkbox"/> | <input type="checkbox"/> | <input type="checkbox"/> |
| I consider a combination of classroom and digital teaching to be promising for the future. | <input type="checkbox"/>  | <input type="checkbox"/> | <input type="checkbox"/> | <input type="checkbox"/> | <input type="checkbox"/> |

## Section C: Teaching and learning in times of Covid 19 (II)

### C1. I can focus on my tasks and be productive in my work.

|                                                          | Yes                      | No                       | No use                   |
|----------------------------------------------------------|--------------------------|--------------------------|--------------------------|
| At home                                                  | <input type="checkbox"/> | <input type="checkbox"/> | <input type="checkbox"/> |
| At the university office                                 | <input type="checkbox"/> | <input type="checkbox"/> | <input type="checkbox"/> |
| Work places and study rooms in the university or library | <input type="checkbox"/> | <input type="checkbox"/> | <input type="checkbox"/> |
| PC workstations                                          | <input type="checkbox"/> | <input type="checkbox"/> | <input type="checkbox"/> |
| Train                                                    | <input type="checkbox"/> | <input type="checkbox"/> | <input type="checkbox"/> |
| Public transport                                         | <input type="checkbox"/> | <input type="checkbox"/> | <input type="checkbox"/> |
| Car, carpooling or carsharing                            | <input type="checkbox"/> | <input type="checkbox"/> | <input type="checkbox"/> |
| With fellow students or in groups                        | <input type="checkbox"/> | <input type="checkbox"/> | <input type="checkbox"/> |

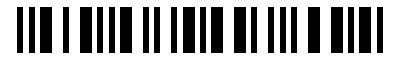

**C2. I tend to get easily distracted while I am studying or working.**

|                                                          | Yes                      | No                       | No use                   |
|----------------------------------------------------------|--------------------------|--------------------------|--------------------------|
| At home                                                  | <input type="checkbox"/> | <input type="checkbox"/> | <input type="checkbox"/> |
| At the university office                                 | <input type="checkbox"/> | <input type="checkbox"/> | <input type="checkbox"/> |
| Work places and study rooms in the university or library | <input type="checkbox"/> | <input type="checkbox"/> | <input type="checkbox"/> |
| PC workstations                                          | <input type="checkbox"/> | <input type="checkbox"/> | <input type="checkbox"/> |
| Train                                                    | <input type="checkbox"/> | <input type="checkbox"/> | <input type="checkbox"/> |
| Public transport                                         | <input type="checkbox"/> | <input type="checkbox"/> | <input type="checkbox"/> |
| Car, carpooling or carsharing                            | <input type="checkbox"/> | <input type="checkbox"/> | <input type="checkbox"/> |
| With fellow students or in groups                        | <input type="checkbox"/> | <input type="checkbox"/> | <input type="checkbox"/> |

**C3. What are sustainability-conscious digital courses in your opinion? [Multiple selection possible]**

|                                                                                           |                          |
|-------------------------------------------------------------------------------------------|--------------------------|
| Solely self-study: Upload of materials & possibility of consultation in case of questions | <input type="checkbox"/> |
| Auditory: Presentation of materials with auditory explanation                             | <input type="checkbox"/> |
| Visual: Presentation of materials by means of video                                       | <input type="checkbox"/> |
| Self tests                                                                                | <input type="checkbox"/> |
| Use of digital forum function                                                             | <input type="checkbox"/> |
| Formation of learning groups                                                              | <input type="checkbox"/> |
| Blended-Learning-Design: Kombination aus digitalen und Präsenzelementen                   | <input type="checkbox"/> |

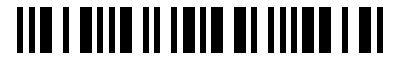

Blended learning design: Combination of digital and classroom elements

☐

Other

☐

Other

**C4. What do you find particularly challenging while working and learning at home?**

**C5. What advantages of digital courses do you see compared to classroom courses with regard to sustainability?**

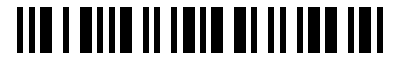

**C6. What disadvantages of digital courses do you see compared to classroom courses with regard to sustainability?**

## **Section D: Digitization and Sustainability (I)**

**D1. There is the opportunity to use a quiet workplace or to set it up temporarily at home.**

Yes ☐

No ☐

**D2. What equipment do you use for digital courses? [Multiple selection possible]**

Notebook ☐

Additional screen ☐

Microphone ☐

Headset ☐

Camera ☐

Tablet ☐

Smartphone ☐

Printer ☐

Powerbanks ☐

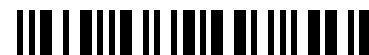

Television ☐

Other ☐

Other

**D3. The following equipment has been purchased or borrowed especially for digital courses since March 2020:**

|                   | Acquir<br>ed             | Borrow<br>ed             | Neither /<br>Already<br>existing |
|-------------------|--------------------------|--------------------------|----------------------------------|
| Notebook          | <input type="checkbox"/> | <input type="checkbox"/> | <input type="checkbox"/>         |
| Additional screen | <input type="checkbox"/> | <input type="checkbox"/> | <input type="checkbox"/>         |
| Microphon         | <input type="checkbox"/> | <input type="checkbox"/> | <input type="checkbox"/>         |
| Headset           | <input type="checkbox"/> | <input type="checkbox"/> | <input type="checkbox"/>         |
| Camera            | <input type="checkbox"/> | <input type="checkbox"/> | <input type="checkbox"/>         |
| Tablet            | <input type="checkbox"/> | <input type="checkbox"/> | <input type="checkbox"/>         |
| Smartphone        | <input type="checkbox"/> | <input type="checkbox"/> | <input type="checkbox"/>         |
| Printer           | <input type="checkbox"/> | <input type="checkbox"/> | <input type="checkbox"/>         |
| Powerbanks        | <input type="checkbox"/> | <input type="checkbox"/> | <input type="checkbox"/>         |
| Television        | <input type="checkbox"/> | <input type="checkbox"/> | <input type="checkbox"/>         |
| Other             | <input type="checkbox"/> | <input type="checkbox"/> | <input type="checkbox"/>         |

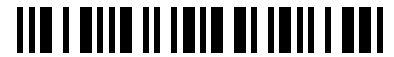

**D4. For the acquisition of necessary technical equipment for digital courses I have sufficient financial resources.**

Yes ☐

No ☐

**D5. When purchasing technical equipment I pay attention to sustainability labels / circularity / sustainable production or value chains and select my product(s) and service(s) accordingly.**

Yes ☐

No ☐

Sometimes ☐

**D6. Is the bandwidth of your internet connection at home sufficient for digital teaching and learning?**

Yes ☐

No ☐

**D7. Based on challenges concerning bandwidth of internet connection:**

:

Very rarely   Rarely   From time to time   Often   Very often

How often have you experienced problems? ☐ ..... ☐ ..... ☐ ..... ☐ ..... ☐

**D8. I do not care where the power for my digital consumption comes from.**

Yes ☐

No ☐

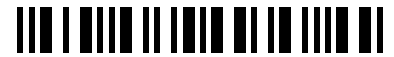

**D9. Do you use green electricity at home?**

Yes ☐

No ☐

**D10. I do know about the greenhouse gas reduction strategies of my provider for digital products or services.**

Yes ☐

No ☐

**D11. I am actively looking for providers of digital products and services who pursue a proactive climate strategy or other sustainability strategies.**

Yes ☐

No ☐

**D12. I do know about the sustainability effects of using digital media and services.**

Yes ☐

No ☐

**Section E: Digitization and Sustainability (II)**

**E1. My digital usage pattern is:**

|                                                                      | Very rarely              | Rather rarely            | From time to time        | Quite often              | Very often               |
|----------------------------------------------------------------------|--------------------------|--------------------------|--------------------------|--------------------------|--------------------------|
| I always send large files (larger than 25 MB) as e-mail attachments. | <input type="checkbox"/> |
| I use cloud solutions to store large files (larger than 25 MB).      | <input type="checkbox"/> |
| I regularly delete outdated files.                                   | <input type="checkbox"/> |
| I always print files and store them.                                 | <input type="checkbox"/> |

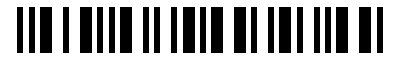

Very  
rarely

Rather  
rarely

From  
time to  
time

Quite  
often

Very  
often

I avoid printing on paper.

|                          |       |                          |       |                          |       |                          |       |                          |
|--------------------------|-------|--------------------------|-------|--------------------------|-------|--------------------------|-------|--------------------------|
| <input type="checkbox"/> | ..... | <input type="checkbox"/> |
|--------------------------|-------|--------------------------|-------|--------------------------|-------|--------------------------|-------|--------------------------|

**E2. I use Streaming media daily ... hours (on average).**

|                      |                      |                      |
|----------------------|----------------------|----------------------|
| <input type="text"/> | <input type="text"/> | <input type="text"/> |
|----------------------|----------------------|----------------------|

**E3. How has your consumption behaviour changed while working or learning at home compared to working or learning at the university?**

Increas  
ing

Unchang  
ing / Not  
applicable

Decrea  
sing

Shopping

|                          |       |                          |       |                          |
|--------------------------|-------|--------------------------|-------|--------------------------|
| <input type="checkbox"/> | ..... | <input type="checkbox"/> | ..... | <input type="checkbox"/> |
|--------------------------|-------|--------------------------|-------|--------------------------|

E-Shopping

|                          |       |                          |       |                          |
|--------------------------|-------|--------------------------|-------|--------------------------|
| <input type="checkbox"/> | ..... | <input type="checkbox"/> | ..... | <input type="checkbox"/> |
|--------------------------|-------|--------------------------|-------|--------------------------|

Social interaction

|                          |       |                          |       |                          |
|--------------------------|-------|--------------------------|-------|--------------------------|
| <input type="checkbox"/> | ..... | <input type="checkbox"/> | ..... | <input type="checkbox"/> |
|--------------------------|-------|--------------------------|-------|--------------------------|

Use of social media

|                          |       |                          |       |                          |
|--------------------------|-------|--------------------------|-------|--------------------------|
| <input type="checkbox"/> | ..... | <input type="checkbox"/> | ..... | <input type="checkbox"/> |
|--------------------------|-------|--------------------------|-------|--------------------------|

Consumption and storage of gigabytes

|                          |       |                          |       |                          |
|--------------------------|-------|--------------------------|-------|--------------------------|
| <input type="checkbox"/> | ..... | <input type="checkbox"/> | ..... | <input type="checkbox"/> |
|--------------------------|-------|--------------------------|-------|--------------------------|

Streaming

|                          |       |                          |       |                          |
|--------------------------|-------|--------------------------|-------|--------------------------|
| <input type="checkbox"/> | ..... | <input type="checkbox"/> | ..... | <input type="checkbox"/> |
|--------------------------|-------|--------------------------|-------|--------------------------|

Binge-Watching

|                          |       |                          |       |                          |
|--------------------------|-------|--------------------------|-------|--------------------------|
| <input type="checkbox"/> | ..... | <input type="checkbox"/> | ..... | <input type="checkbox"/> |
|--------------------------|-------|--------------------------|-------|--------------------------|

Downloads

|                          |       |                          |       |                          |
|--------------------------|-------|--------------------------|-------|--------------------------|
| <input type="checkbox"/> | ..... | <input type="checkbox"/> | ..... | <input type="checkbox"/> |
|--------------------------|-------|--------------------------|-------|--------------------------|

**E4. I use my digital devices until they break down or cannot be repaired any longer.**

Yes

Partly

No

Not  
applicable

Smartphone

|                          |       |                          |       |                          |       |                          |
|--------------------------|-------|--------------------------|-------|--------------------------|-------|--------------------------|
| <input type="checkbox"/> | ..... | <input type="checkbox"/> | ..... | <input type="checkbox"/> | ..... | <input type="checkbox"/> |
|--------------------------|-------|--------------------------|-------|--------------------------|-------|--------------------------|

Notebook

|                          |       |                          |       |                          |       |                          |
|--------------------------|-------|--------------------------|-------|--------------------------|-------|--------------------------|
| <input type="checkbox"/> | ..... | <input type="checkbox"/> | ..... | <input type="checkbox"/> | ..... | <input type="checkbox"/> |
|--------------------------|-------|--------------------------|-------|--------------------------|-------|--------------------------|

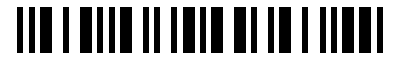

|                | Yes                      | Partly                   | No                       | Not applicable           |
|----------------|--------------------------|--------------------------|--------------------------|--------------------------|
| Keyboard/Mouse | <input type="checkbox"/> | <input type="checkbox"/> | <input type="checkbox"/> | <input type="checkbox"/> |
| Headset        | <input type="checkbox"/> | <input type="checkbox"/> | <input type="checkbox"/> | <input type="checkbox"/> |
| Camera         | <input type="checkbox"/> | <input type="checkbox"/> | <input type="checkbox"/> | <input type="checkbox"/> |
| Printer        | <input type="checkbox"/> | <input type="checkbox"/> | <input type="checkbox"/> | <input type="checkbox"/> |
| Powerbanks     | <input type="checkbox"/> | <input type="checkbox"/> | <input type="checkbox"/> | <input type="checkbox"/> |
| Television     | <input type="checkbox"/> | <input type="checkbox"/> | <input type="checkbox"/> | <input type="checkbox"/> |

**E5. What means of transport do you mainly use to get to the university? [Multiple selection possible]**

|                         |                          |
|-------------------------|--------------------------|
| On foot                 | <input type="checkbox"/> |
| Bicycle                 | <input type="checkbox"/> |
| Car                     | <input type="checkbox"/> |
| Carpooling / Carsharing | <input type="checkbox"/> |
| Public transport        | <input type="checkbox"/> |
| Train                   | <input type="checkbox"/> |
| Other                   | <input type="checkbox"/> |

Other

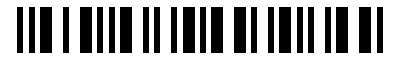

E6. On average, how many days per week have you been at the university - before the COVID-19 pandemic?

E7. On average, how many days per week have you been at the university since the COVID-19 pandemic?

E8. How many kilometers do you travel from your place of residence to the university (one way)?

|  |  |  |  |  |  |  |  |  |  |
|--|--|--|--|--|--|--|--|--|--|
|  |  |  |  |  |  |  |  |  |  |
|--|--|--|--|--|--|--|--|--|--|

## Section F: Closing

F1. Do you have further comments concerning digital teaching, learning and sustainability?

|  |
|--|
|  |
|--|

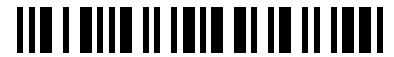

**Thank you very much for your participation in the survey on digitization and sustainability in teaching and learning. In doing so, you are contributing to the further development and improvement of digital education with regard to ecological and social sustainability.**
